# Supplementary material for: The impact of lateral placenta on preeclampsia and small for gestational age neonates: a systematic review and meta-analysis
Source: publisher site journal article supplement (doi:10.1515/jpm-2022-0118), 2022-09-29
Supplement: Supplementary file 5 [file Supplemental Figures_legends.docx]

**Supplemental Figure 1.** Forest plot for the outcome fetal growth restriction in lateral versus non-lateral placentas (control).

**Supplemental Figure 2.** Forest plot for the outcome neonatal intensive care admission in lateral versus non-lateral placentas (control).

**Supplemental Figure 3.** Funnel plot of case control and cohort studies including hypertensive disorders as outcome.

**Supplemental Figure 4.** Funnel plot of case control and cohort studies including preeclampsia as outcome.
