# Supplementary material for: The impact of lateral placenta on preeclampsia and small for gestational age neonates: a systematic review and meta-analysis
Source: publisher site journal article supplement (doi:10.1515/jpm-2022-0118), 2022-09-29
Supplement: Supplementary file 6 [file Suppmaterial search.docx]

Scopus 1/11/2021

8 ( TITLE-ABS-KEY ( placental AND location ) ) OR ( TITLE-ABS-KEY ( placental AND laterality ) ) OR ( TITLE-ABS-KEY ( placental AND lateral AND localization ) ) OR ( TITLE-ABS-KEY ( lateral AND placenta ) ) OR ( TITLE ( placental AND site ) ) OR ( TITLE ( placental AND implantation ) ) OR ( TITLE-ABS-KEY ( laterally AND located AND placenta ) ) **2,821** document results

7 TITLE-ABS-KEY ( placental AND lateral AND localization ) 61 document results

6 TITLE-ABS-KEY ( laterally AND located AND placenta ) 17 document results

5 TITLE ( placental AND site ) 667 document results

4 TITLE ( placental AND implantation ) 154 document results

3 TITLE-ABS-KEY ( lateral AND placenta ) 534 document results

2 TITLE-ABS-KEY ( placental AND laterality ) 47 document results

1 TITLE-ABS-KEY ( placental AND location ) 1,520 document results

Pubmed 1/11/2021

| **Search** | **Query** | **Results** | **Time** |
| --- | --- | --- | --- |
| #8 | Search: **#1 or #2 or #3 or #4 or #5 or #6 or #7** | [2,210](https://pubmed.ncbi.nlm.nih.gov/?term=%231+or+%232+or+%233+or+%234+or+%235+or+%236+or+%237&ac=no&sort=relevance) | 13:43:21 |
| #7 | Search: **placental implantation[Title/Abstract]** | [305](https://pubmed.ncbi.nlm.nih.gov/?term=placental+implantation%5BTitle%2FAbstract%5D&ac=no&sort=relevance) | 13:42:54 |
| #6 | Search: **placental site[Title/Abstract]** | [844](https://pubmed.ncbi.nlm.nih.gov/?term=placental+site%5BTitle%2FAbstract%5D&ac=no&sort=relevance) | 13:42:47 |
| #5 | Search: **placental [Title/Abstract] AND lateral [Title/Abstract] AND localization[Title/Abstract]** | [21](https://pubmed.ncbi.nlm.nih.gov/?term=placental+%5BTitle%2FAbstract%5D+AND+lateral+%5BTitle%2FAbstract%5D+AND+localization%5BTitle%2FAbstract%5D&ac=no&sort=relevance) | 13:42:36 |
| #4 | Search: **laterally [Title/Abstract] AND located [Title/Abstract] AND placenta[Title/Abstract]** | [11](https://pubmed.ncbi.nlm.nih.gov/?term=laterally+%5BTitle%2FAbstract%5D+AND+located+%5BTitle%2FAbstract%5D+AND+placenta%5BTitle%2FAbstract%5D&ac=no&sort=relevance) | 13:42:14 |
| #3 | Search: **lateral [Title/Abstract] AND placenta[Title/Abstract]** | [247](https://pubmed.ncbi.nlm.nih.gov/?term=lateral+%5BTitle%2FAbstract%5D+AND+placenta%5BTitle%2FAbstract%5D&ac=no&sort=relevance) | 13:42:06 |
| #2 | Search: **placental [Title/Abstract] AND laterality[Title/Abstract]** | [22](https://pubmed.ncbi.nlm.nih.gov/?term=placental+%5BTitle%2FAbstract%5D+AND+laterality%5BTitle%2FAbstract%5D&ac=no&sort=relevance) | 13:41:58 |
| #1 | Search: **placental [Title/Abstract] AND location[Title/Abstract]** | [895](https://pubmed.ncbi.nlm.nih.gov/?term=placental+%5BTitle%2FAbstract%5D+AND+location%5BTitle%2FAbstract%5D&ac=no&sort=relevance) | 13:41:49 |

Search Name: Lateral Placenta

Date Run: 01/11/2021 01:58:39

Comment:

ID Search Hits

#1 placental location 93

#2 Placental site 240

#3 Placental laterality 1

#4 lateral placenta 54

#5 placental implantation 58

#6 laterally located placenta 0

#7 placental lateral localization 3

#8 #1 OR #2 OR #3 OR #4 OR #5 OR #6 OR #7 389

Total: 5420 – 1486(duplicates) = 3.934 were reviewed
