# Supplementary material for: The impact of lateral placenta on preeclampsia and small for gestational age neonates: a systematic review and meta-analysis
Source: publisher site journal article supplement (doi:10.1515/jpm-2022-0118), 2022-09-29
Supplement: Supplementary file 7 [file Table S1.docx]

**Table S1.** Characteristics of the included studies

| **Study** | **Country** | **Study Design** | **Lateral placenta group** | **Control group** | **Outcomes explored** | **Risk of Bias** | **Definition of Lateral placenta (% of placental mass over the midline)** | **Incidence of lateral placenta (%)** |
| --- | --- | --- | --- | --- | --- | --- | --- | --- |
| Antsaklis et al., (2000) | Greece | Prospective cohort | n=419  Scan: 19-21w  Period: 1997-1998 | n=235  Non-lateral | PE | medium | >75% | 63.7 |
| Dagklis et al., (2020) | Greece | Retrospective cohort | n=451  Scan: 20+0-23+6w  Period: 2016-2019 | n=5,040  Non-lateral  [Posterior (n=2,399), Anterior (n=2,470), Fundal (n=171)] | SGA, BW, PE, GA at birth, PTD | medium | >66% | 8.2 |
| Devarajan et al., (2012) | Canada | Retrospective cohort | n=133  Delivery ≥37w  Scan: 16-24w  Period: 2009 | n=663  Central / Fundal placenta | SGA, BW, NICU admission, Perinatal death, PIH or PE | medium | Not quantified | 16.7 |
| Fung et al., (2011) | China | Retrospective cohort | n=628  Scan: 14+0-23+6w  Period: 2000-2007 | n=14,999  Non-lateral  [Central placenta (n=14,591) Fundal placenta (n=408)] | SGA, PE or eclampsia, pre-existing diabetes or GDM, onset of labor, mode of delivery, GA at delivery, PTD, 5΄ Apgar score, NICU admission | medium | Not quantified | 6.6 |
| Gonser et al., (1996) | Germany | Prospective cohort | n=115  Scan: 24-36w  Period: not reported | n=33  Central placenta | PE | medium | >75% | 78.0 |
| Granfors et al., (2019) | Sweden | Retrospective cohort | n=1860  Nulliparous, live birth  Scan: 16+0-22+6w  Period: 2008-2014 | n=72,227  Non-lateral  [Anterior (n=35,409)  Posterior (n=34,344)  Fundal (n=2,474)] | PROM, SGA (<2SD), LGA (>2SD), PE, PTD, 1- and 5΄ Apgar score (<7), PPH (>1,000ml) | low | Not quantified | 2.5 |
| Kakkar et al., (2013) | India | Prospective cohort | n=84  Scan: 18-24w  Period: 2006-2007 | n=66  Non-lateral | PE | medium | >75% | 56.0 |
| Kalanithi et al., (2007) | USA | Retrospective case-control | n=24  Scan: 16-20w  Period: 2000-2005 | n=324  Non-lateral  Central [Anterior (n=121) Posterior (n=91) Fundal (n=21)] | FGR | low | Not quantified | 8.8 |
| Kofinas et al.,  1989 | USA | Retrospective cohort | n=162  Scan: 24-28w  Period: not reported | n=138  Central placenta | PE, FGR | medium | Not quantified | 54.0 |
| Kore et al., 2016 | India | Prospective cohort | n=39  Scan: 20-24w  Period: not reported | n=161  Central placenta | PE, FGR | medium | >70% | 19.5 |
| Liberati et al., 1997 | Italy | Retrospective cohort | n=481  Scan: 22-24w  Period: 1993-1996 | n=251  Non-lateral | PIH, SGA | medium | >75% | 9.1 |
| Parul et al., (2015) | India | Prospective cohort | n=80  primigravidas  Scan: 18-22w  Period: 20013-2014 | n=320  Central placenta | PE | medium | >75% | 20.0 |
| Salama-Bello et al., (2019) | USA | Retrospective cohort | n=53  Scan: 18-36w  Period: 2014-2015 | n=411  Central placenta | PIH, PE, SGA, GA at delivery | medium | Not quantified | 11.4 |
| Seckin et al., (2015) | Turkey | Retrospective cohort | n=133  Scan: 18-24w  Period: 2012 | n=919  Non-lateral | GDM, PIH, PE, FGR, SGA (<10th), BW, oligohydramnios, macrosomia, fetal demise, PTD, PPROM, placental abruption, PPH, 5΄ Apgar score, NICU admission | low | >75% | 12.6 |
| Shah et al., (2021) | India | Prospective cohort | n=205  Scan: 18-24 w  Period: 2015-2017 | n=192  Central placenta | PE, FGR, 5΄ Apgar score (<7), NICU admission | medium | >75% | 51.6 |
| Yousuf et al., (2016) | India | Prospective cohort | n=71  Normotensive, primigravidas  Scan: 18-22w  Period: 2013-2014 | n=130  Non-lateral | PE | high | >70% | 24.5 |

*PE: preeclampsia; BW: birthweight; GA: gestational age; SGA: small for gestational age; NICU: neonatal intensive care unit; LGA: large for gestational age; FGR: fetal growth restriction; PIH: pregnancy induced hypertension; PPROM: preterm premature rupture of membranes, GDM: gestational diabetes mellitus, PPH: postpartum hemorrhage, PTD: preterm delivery*
