# Supplementary material for: The impact of lateral placenta on preeclampsia and small for gestational age neonates: a systematic review and meta-analysis
Source: publisher site journal article supplement (doi:10.1515/jpm-2022-0118), 2022-09-29
Supplement: Supplementary file 8 [file Table S2.docx]

**Table S2.** Quality assessment of the studies according to the Newcastle-Ottawa Scale

| Study | Study type | Selection | | | | Comparability | Outcome | | | Risk of bias (total stars) |
| --- | --- | --- | --- | --- | --- | --- | --- | --- | --- | --- |
| 1 | 2 | 3 | 4 | 5, 6 | 7 | 8 | 9 |
| Antsaklis et al., (2000) | Prospective cohort | b+1 | a+1 | a+1 | a+1 | - | b+1 | a+1 | c0 | High (6) |
| Dagklis et al., (2020) | Retrospective cohort | b+1 | a+1 | a+1 | a+1 | - | b+1 | a+1 | a+1 | Medium (7) |
| Devarajan et al., (2012) | Retrospective cohort | b+1 | a+1 | a+1 | a+1 | - | a+1 | a+1 | a+1 | Medium (7) |
| Fung et al., (2011) | Retrospective cohort | b+1 | a+1 | a+1 | a+1 | - | a+1 | a+1 | a+1 | Medium (7) |
| Gonser et al., (1996) | Prospective cohort | b+1 | a+1 | a+1 | a+1 | - | b+1 | a+1 | a+1 | Medium (7) |
| Granfors et al., (2019) | Retrospective cohort | b+1 | a+1 | a+1 | a+1 | a, b+2 | b+1 | a+1 | a+1 | Low (9) |
| Kakkar et al., (2013) | Prospective cohort | b+1 | a+1 | a+1 | a+1 | - | b+1 | a+1 | a+1 | Medium (7) |
| Kalanithi et al., (2007) | Retrospective case-control | a+1 | a+1 | a+1 | a+1 | a, b+2 | a+1 | a+1 | a+1 | Low (9) |
| Kofinas et al., (1989) | Retrospective cohort | b+1 | a+1 | a+1 | a+1 | - | b+1 | a+1 | a+1 | Medium (7) |
| Kore et al., (2016) | Prospective cohort | b+1 | a1 | a1 | a1 | - | a+1 | a+1 | a+1 | Medium (7) |
| Liberati et al., (1997) | Retrospective cohort | b+1 | a+1 | a+1 | a+1 | - | b+1 | a+1 | a+1 | Medium (7) |
| Parul et al., (2015) | Prospective cohort | b+1 | a+1 | a+1 | a+1 | - | b+1 | a+1 | a+1 | Medium (7) |
| Salama-Bello et al., (2019) | Retrospective cohort | b+1 | a+1 | a+1 | a+1 | - | a+1 | a+1 | a+1 | Medium (7) |
| Seckin et al., (2015) | Retrospective cohort | b+1 | a+1 | a+1 | a+1 | a, b+2 | b+1 | a+1 | a+1 | Low (9) |
| Shah et al., (2021) | Prospective cohort | b+1 | a+1 | a+1 | a+1 | - | a+1 | a+1 | a+1 | Medium (7) |
| Yousuf et al., (2016) | Prospective cohort | b+1 | a+1 | a+1 | a+1 | - | d0 | a+1 | a+1 | High (6) |
